# Supplementary material for: Human Neocortical Neurosolver (HNN), a new software tool for interpreting the cellular and network origin of human MEG/EEG data
Source: eLife. 2020 Jan 22;9:e51214. doi: 10.7554/eLife.51214 (PMC7018509; doi:10.7554/eLife.51214)
Supplement: Supplementary file 1. — The ranking of each input’s parameters is similar between models. [file elife-51214-supp1.xlsx]

## Sheet: Sheet1
		Suprathreshold -- 100% detected			50% detected
		Proximal Input 1 Parameter	Average Weighted Total Sobol Index		Proximal Input 1 Parameter	Average Weighted Total Sobol Index
		L5 Pyramidal NMDA Strength	0.6243		L5 Pyramidal NMDA Strength	0.5952
		Mean start time	0.3059		L5 Basket NMDA Strength	0.2998
		L5 Basket NMDA Strength	0.2748		Mean start time	0.2326
		L2 Basket NMDA Strength	0.1702		L5 Basket AMPA Strength	0.1561
		L5 Basket AMPA Strength	0.1672		L2 Pyramidal NMDA Strength	0.1458
		L2 Pyramidal NMDA Strength	0.1349		L2 Basket NMDA Strength	0.0982
		L2 Basket AMPA Strength	0.1055		L2 Basket AMPA Strength	0.0486
		L2 Pyramidal AMPA Strength	0.0519		L5 Pyramidal AMPA Strength	0.0289
		L5 Pyramidal AMPA Strength	0.0449		L2 Pyramidal AMPA Strength	0.0111
		Distal Input 1 Parameter	Average Weighted Total Sobol Index		Distal Input 1 Parameter	Average Weighted Total Sobol Index
		L5 Pyramidal NMDA Strength	0.5163		L5 Pyramidal NMDA Strength	0.5631
		Mean start time	0.4545		Mean start time	0.4442
		L2 Basket AMPA Strength	0.0924		L2 Pyramidal NMDA Strength	0.0681
		L2 Pyramidal NMDA Strength	0.0781		L2 Basket NMDA Strength	0.0432
		L2 Basket NMDA Strength	0.0615		L5 Pyramidal AMPA Strength	0.0292
		L2 Pyramidal AMPA Strength	0.0202		L2 Basket AMPA Strength	0.0149
		L5 Pyramidal AMPA Strength	0.0099		L2 Pyramidal AMPA Strength	0
			Average Weighted Total Sobol Index		Proximal Input 2 Parameter	Average Weighted Total Sobol Index
		Mean start time	0.9018		Mean start time	0.8424
		L5 Pyramidal AMPA Strength	0.0726		L5 Pyramidal NMDA Strength	0.1667
		L5 Pyramidal NMDA Strength	0.0475		L5 Pyramidal AMPA Strength	0.0514
		L5 Basket NMDA Strength	0.0128		L5 Basket NMDA Strength	0.0223
		L2 Basket NMDA Strength	0.0115		L2 Pyramidal AMPA Strength	0.0121
		L2 Pyramidal NMDA Strength	0.0101		L2 Pyramidal NMDA Strength	0.0068
		L2 Pyramidal AMPA Strength	0.0045		L2 Basket NMDA Strength	0.0041
		L5 Basket AMPA Strength	0.0026		L5 Basket AMPA Strength	0.0032
		L2 Basket AMPA Strength	0.0001		L2 Basket AMPA Strength	0
			ERP Model -- 50% detected		ERP Model -- 100% detected
	Driving Input	Parameter name	Average Weighted Total Sobol Index	Rank	Average Weighted Total Sobol Index	Rank
	Proximal Input 1	Mean start time	0.2326	3	0.3059	2
		L2 Pyramidal NMDA Strength	0.1458	5	0.1349	6
		L2 Pyramidal AMPA Strength	0.0111	9	0.0519	8
		L5 Pyramidal NMDA Strength	0.5952	1	0.6243	1
		L5 Pyramidal AMPA Strength	0.0289	8	0.0449	9
		L2 Basket NMDA Strength	0.0982	6	0.1702	4
		L2 Basket AMPA Strength	0.0486	7	0.1055	7
		L5 Basket NMDA Strength	0.2998	2	0.2748	3
		L5 Basket AMPA Strength	0.1561	4	0.1672	5
	Distal Input 1	Mean start time	0.4442	2	0.4545	2
		L2 Pyramidal NMDA Strength	0.0681	3	0.0781	4
		L2 Pyramidal AMPA Strength	0	7	0.0202	6
		L5 Pyramidal NMDA Strength	0.5631	1	0.5163	1
		L5 Pyramidal AMPA Strength	0.0292	5	0.0099	7
		L2 Basket NMDA Strength	0.0432	4	0.0615	5
		L2 Basket AMPA Strength	0.0149	6	0.0924	3
	Proximal Input 2	Mean start time	0.8424	1	0.9018	1
		L2 Pyramidal NMDA Strength	0.0068	6	0.0101	6
		L2 Pyramidal AMPA Strength	0.0121	5	0.0045	7
		L5 Pyramidal NMDA Strength	0.1667	2	0.0475	3
		L5 Pyramidal AMPA Strength	0.0514	3	0.0726	2
		L2 Basket NMDA Strength	0.0041	7	0.0115	5
		L2 Basket AMPA Strength	0	9	0.0001	9
		L5 Basket NMDA Strength	0.0223	4	0.0128	4
		L5 Basket AMPA Strength	0.0032	8	0.0026	8
